# Supplementary material for: Genetic and tumor microenvironment differences between cell cycle progression pathway altered/non-altered patients with lung adenocarcinoma
Source: Research Square preprint supplement (doi:10.21203/rs.3.rs-464643/v1), 2021-04-30
Supplement: Supplementary file 1 [file 982401ffaf1bca6fb461f352.docx]

**Table 1 Clinical features of the LUAD patients**

**Mutation Wild Overall P-value**

**(N=57) (N=453) (N=510)**

**Age**

Mean (SD) 64.5 (9.85) 65.4 (10.1) 65.3 (10.1) 0.55

Median [Min, Max] 64.0 [41.0, 82.0] 66.0 [33.0, 88.0] 66.0 [33.0, 88.0]

NA 0 (0%) 19 (4.2%) 19 (3.7%)

**Smoking history**

Current smokers 19 (33.3%) 100 (22.1%) 119 (23.3%) 0.0721

Never smokers 4 (7.0%) 70 (15.5%) 74 (14.5%)

Previous smokers 34 (59.6%) 269 (59.4%) 303 (59.4%)

NA 0 (0%) 14 (3.1%) 14 (2.7%)

**Sex**

Female 29 (50.9%) 246 (54.3%) 275 (53.9%) 0.728

Male 28 (49.1%) 207 (45.7%) 235 (46.1%)

**Race**

Black 11 (19.3%) 40 (8.8%) 51 (10.0%) 0.0452

White 38 (66.7%) 347 (76.6%) 385 (75.5%)

Yellow 2 (3.5%) 6 (1.3%) 8 (1.6%)

NA 6 (10.5%) 60 (13.2%) 66 (12.9%)

**Anatomic location**

Lower lobe, lung 20 (35.1%) 152 (33.6%) 172 (33.7%) 0.471

Middle lobe, lung 1 (1.8%) 20 (4.4%) 21 (4.1%)

Upper lobe, lung 34 (59.6%) 264 (58.3%) 298 (58.4%)

Overlapping lesion of lung 0 (0%) 3 (0.7%) 3 (0.6%)

Main bronchus 1 (1.8%) 1 (0.2%) 2 (0.4%)

Lung 1 (1.8%) 13 (2.9%) 14 (2.7%)

**Stage**

Stage I 31 (54.4%) 242 (53.4%) 273 (53.5%) 0.917

Stage II 13 (22.8%) 107 (23.6%) 120 (23.5%)

Stage III 10 (17.5%) 74 (16.3%) 84 (16.5%)

Stage IV 3 (5.3%) 23 (5.1%) 26 (5.1%)

NA 0 (0%) 7 (1.5%) 7 (1.4%)
